# Supplementary material for: Effects of dietary glucocerebrosides from sea cucumber on the brain sphingolipid profiles of mouse models of Alzheimer's disease
Source: Royal Society of Chemistry journal article supplement (doi:10.1039/c6fo01659f), 2017-01-01
Supplement: c6fo01659f1.pdf [file c6fo01659f1.pdf]

Method: To prove whether the lipids in fresh samples can be fully recovered with this procedure in the study, an experiment of sample preparation for sphingolipids extraction was repeated to compare the procedure in this study with the control procedure of  $35,000 \times g$  centrifugation for 30 min. For each extraction condition, 3 replicate hippocampus and cortex samples (10 mg each) were extracted after adding ice-cold cell lysis buffer (including compound protease inhibitors), homogenizing and standing for 30 min in the ice box, contamination precipitation was removed by centrifuging at  $6,000 \times g$  for 10 min at  $4^{\circ}\text{C}$ , supernatant was centrifuged at  $15,000 \times g$  ( $35,000 \times g$  for 30 min in control group) for 30 min at  $4^{\circ}\text{C}$ , the resulting pellet was resuspended with a modified MTBE extraction procedure using methanol-MTBE- $\text{H}_2\text{O}$  (10/3/2.5, v/v) to build the two-phase system. The upper phase (consisting of sphingolipids) was combined and then was reconstituted in suitable solvents for the analysis of LC-MS/MS. The quantification of Cer, CBS, ST, and SM in samples by NPLC-MS/MS was conducted using the method in 2.7.3 section in this article.

**Table Comparison between two sphingolipid extraction methods (15,000 × g vs 35,000 × g)**

| m/z   | Molecular Species   | Area                          |                  |                  |                  |                              |                  |                  | Ratio<br>Method1/Method2<br>(%) |               |
|-------|---------------------|-------------------------------|------------------|------------------|------------------|------------------------------|------------------|------------------|---------------------------------|---------------|
|       |                     | Method 1 (15000 g for 30 min) |                  |                  |                  | Method 2 (35000 g for 30min) |                  |                  |                                 |               |
|       |                     | Replicate 1                   | Replicate 2      | Replicate 3      | Average          | Replicate 1                  | Replicate 2      | Replicate 3      | Average                         |               |
| 538.5 | Cer(d18:1/16:0)     | 1318027                       | 1905996          | 1604897          | 1609640          | 1719493                      | 1721386          | 1739678          | 1827353                         | 88.09%        |
| 552.5 | Cer(d18:1/17:0)     | 165930                        | 260699           | 233620           | 220083           | 260230                       | 283662           | 429704           | 300708                          | 73.19%        |
| 564.5 | Cer(d18:1/18:1)     | 5329968                       | 3785416          | 3752145          | 4289176          | 5014543                      | 4378769          | 3154263          | 4288814                         | 100.01%       |
| 566.6 | Cer(d18:1/18:0)     | 64135388                      | 65681615         | 59423759         | 63080254         | 59253856                     | 79205158         | 67923890         | 75239134                        | 83.84%        |
| 582.5 | Cer(d18:1/18:0h)    | 952417                        | 767684           | 774180           | 831427           | 917398                       | 790059           | 446984           | 809816                          | 102.67%       |
| 592.6 | Cer(d18:1/20:1)     | 959690                        | 1010422          | 748409           | 906174           | 1154500                      | 1211581          | 693957           | 1371097                         | 66.09%        |
| 594.6 | Cer(d18:1/20:0)     | 2795482                       | 3255614          | 2986355          | 3012484          | 4041035                      | 4732009          | 3953951          | 4567820                         | 65.95%        |
| 620.6 | Cer(d18:1/22:1)     | 10844596                      | 9501387          | 7365632          | 9237205          | 11978524                     | 12211202         | 7891693          | 13409313                        | 68.89%        |
| 622.6 | Cer(d18:1/22:0)     | 731324                        | 1038770          | 1281606          | 1017233          | 916402                       | 1176546          | 1339821          | 1196730                         | 85.00%        |
| 634.6 | Cer(d18:1/23:1)     | 2761941                       | 2790906          | 2175276          | 2576041          | 2934191                      | 3090512          | 2126368          | 3369882                         | 76.44%        |
| 636.6 | Cer(d18:1/23:0)     | 367618                        | 741382           | 711350           | 606783           | 502944                       | 782777           | 815438           | 696836                          | 87.08%        |
| 648.6 | Cer(d18:1/24:1)     | 3781533                       | 4029921          | 3953253          | 3921569          | 2835746                      | 3158745          | 2572213          | 3644375                         | 107.61%       |
| 664.6 | Cer(d18:1/24:1h)    | 1332035                       | 1201237          | 811617           | 1114963          | 1385667                      | 1337604          | 906420           | 1499236                         | 74.37%        |
| 650.6 | Cer(d18:1/24:0)     | 1456205                       | 2223779          | 2825545          | 2168510          | 14266136                     | 5223331          | 11708249         | 3254856                         | 68.70%        |
|       | <b>Total Cer</b>    | <b>96932154</b>               | <b>98194827</b>  | <b>88647644</b>  | <b>94591542</b>  | <b>107180665</b>             | <b>119303341</b> | <b>105702629</b> | <b>119775971</b>                | <b>78.97%</b> |
| 700.6 | GalCer(d18:1/16:0)  | 1381187                       | 1615784          | 1238165          | 1411712          | 1713231                      | 1799727          | 2099730          | 1870896                         | 75.46%        |
| 726.6 | GalCer(d18:1/18:1)  | 33110670                      | 25789694         | 29156176         | 29352180         | 33832207                     | 24419317         | 24192747         | 27481424                        | 106.81%       |
| 728.6 | GalCer(d18:1/18:0)  | 10208321                      | 10555630         | 9153402          | 9972451          | 11833683                     | 11778832         | 13638545         | 12417020                        | 80.31%        |
| 754.6 | GalCer(d18:1/20:1)  | 6892488                       | 7974308          | 5430448          | 6765748          | 8571203                      | 8574552          | 10997832         | 9381196                         | 72.12%        |
| 782.7 | GalCer(d18:1/22:1)  | 69153705                      | 65868182         | 54738419         | 63253435         | 77601958                     | 75260319         | 98573706         | 83811994                        | 75.47%        |
| 784.7 | GalCer(d18:1/22:0)  | 7006680                       | 8737298          | 6697150          | 7480376          | 8061046                      | 9100930          | 11021895         | 9394624                         | 79.62%        |
| 796.7 | GalCer(d18:1/23:1)  | 18428209                      | 19495812         | 16643939         | 18189320         | 17680528                     | 19133841         | 24863601         | 20559323                        | 88.47%        |
| 798.7 | GalCer(d18:1/23:0)  | 2540047                       | 3882660          | 2646074          | 3022927          | 3157304                      | 3181242          | 4374541          | 3571029                         | 84.65%        |
| 810.7 | GalCer(d18:1/24:1)  | 128466219                     | 123228106        | 108403286        | 120032537        | 152060339                    | 157125461        | 184607121        | 164597640                       | 72.92%        |
| 812.7 | GalCer(d18:1/24:0)  | 25286744                      | 20306852         | 32232187         | 25941928         | 23341524                     | 20252914         | 25337226         | 22977221                        | 112.90%       |
| 824.7 | GalCer(d18:1/25:1)  | 1542868                       | 1838024          | 1995288          | 1792060          | 1743487                      | 2219023          | 2049564          | 2004025                         | 89.42%        |
| 826.7 | GalCer(d18:1/25:0)  | 839097                        | 670474           | 1119314          | 876295           | 865816                       | 651638           | 735692           | 751049                          | 116.68%       |
| 838.7 | GalCer(d18:1/26:0)  | 1172882                       | 1302176          | 1459240          | 1311433          | 1759605                      | 1592572          | 2021251          | 1791143                         | 73.22%        |
|       | <b>Total GalCer</b> | <b>306029117</b>              | <b>291265000</b> | <b>270913088</b> | <b>289402402</b> | <b>342221931</b>             | <b>335090368</b> | <b>404513451</b> | <b>360608583</b>                | <b>80.25%</b> |
| 778.5 | ST(d18:1-C16:0)     | 368055                        | 336706           | 279252           | 328004           | 400338                       | 353495           | 344375           | 366069                          | 89.60%        |
| 806.5 | ST(d18:1-C18:0)     | 8452543                       | 6985928          | 6896005          | 7444825          | 8595888                      | 9256862          | 7564352          | 8472367                         | 87.87%        |
| 822.5 | ST(d18:1-C18:0h)    | 2492695                       | 2056864          | 2208034          | 2252531          | 2689818                      | 2650092          | 2102210          | 2480707                         | 90.80%        |
| 834.6 | ST(d18:1-C20:0)     | 954901                        | 673248           | 764837           | 797662           | 1062846                      | 956578           | 1084971          | 1034798                         | 77.08%        |
| 862.6 | ST(d18:1-C22:0)     | 5878993                       | 4089344          | 4624337          | 4864224          | 6012890                      | 6072534          | 6935124          | 6340183                         | 76.72%        |
| 878.6 | ST(d18:1-C22:0h)    | 9441818                       | 6289411          | 7735528          | 7822252          | 9156177                      | 9239194          | 9556009          | 9317127                         | 83.96%        |
| 888.6 | ST(d18:1-C24:1)     | 32777592                      | 24258370         | 26994735         | 28010232         | 33104858                     | 33428935         | 38881849         | 35138547                        | 79.71%        |
| 904.6 | ST(d18:1-C24:1h)    | 4541735                       | 3244416          | 3238313          | 3674821          | 3964542                      | 3934516          | 4602856          | 4167305                         | 88.18%        |
| 890.6 | ST(d18:1-C24:0)     | 12376390                      | 8575453          | 9239066          | 10063636         | 12934354                     | 13353334         | 16779335         | 14355674                        | 70.10%        |
| 906.6 | ST(d18:1-C24:0h)    | 7572765                       | 5668958          | 6429225          | 6556983          | 7694504                      | 8186349          | 8494181          | 8125011                         | 80.70%        |
| 916.7 | ST(d18:1-C26:1)     | 272780                        | 220467           | 260996           | 251414           | 335385                       | 347867           | 390920           | 358057                          | 70.22%        |

|       |                                                     |                  |                  |                  |                  |                  |                  |                  |                  |               |
|-------|-----------------------------------------------------|------------------|------------------|------------------|------------------|------------------|------------------|------------------|------------------|---------------|
| 918.7 | ST(d18:1-C26:0)                                     | 86518            | 62045            | 82798            | 77120            | 107604           | 114589           | 130942           | 117712           | 65.52%        |
| 934.7 | ST(d18:1-C26:0h)                                    | 94427            | 62887            | 74390            | 77235            | 124265           | 105701           | 117754           | 115907           | 66.64%        |
|       | <b>Total ST</b>                                     | <b>85311211</b>  | <b>62524097</b>  | <b>68827516</b>  | <b>72220941</b>  | <b>86183469</b>  | <b>88000046</b>  | <b>96984878</b>  | <b>90389464</b>  | <b>79.90%</b> |
| 747.6 | SM(d18:1/16:0)                                      | 2473761.6        | 4190612          | 2667763          | 5554466          | 3038668          | 2821209          | 3228457          | 3029445          | 102.68%       |
| 775.6 | SM(d18:1/18:0)                                      | 75260431.8       | 84166724         | 75451572         | 125190349        | 100819598        | 97805193         | 90584369         | 96403053         | 81.21%        |
| 803.6 | SM(d18:1/20:0)                                      | 4461269.4        | 3081767          | 3671816          | 8286727          | 6168176          | 6136096          | 6023939          | 6109404          | 61.19%        |
| 831.7 | SM(d18:1/22:0)                                      | 1060080.6        | 671567           | 931560           | 2451329          | 1478283          | 1208325          | 1444688          | 1377099          | 64.46%        |
| 857.7 | SM(d18:1/24:1)                                      | 3058286.4        | 2031405          | 2572036          | 9428999          | 3596021          | 3567611          | 4093945          | 3752526          | 68.06%        |
|       | <b>Total SM</b>                                     | <b>86313829</b>  | <b>94142075</b>  | <b>85294747</b>  | <b>150911870</b> | <b>115100746</b> | <b>111538434</b> | <b>105375398</b> | <b>110671526</b> | <b>80.04%</b> |
|       | <b>Total sphingolipid<br/>(Cer, GalCer, ST, SM)</b> | <b>574586312</b> | <b>546125999</b> | <b>513682994</b> | <b>544798435</b> | <b>650686811</b> | <b>653932189</b> | <b>739717633</b> | <b>681445544</b> | <b>79.95%</b> |

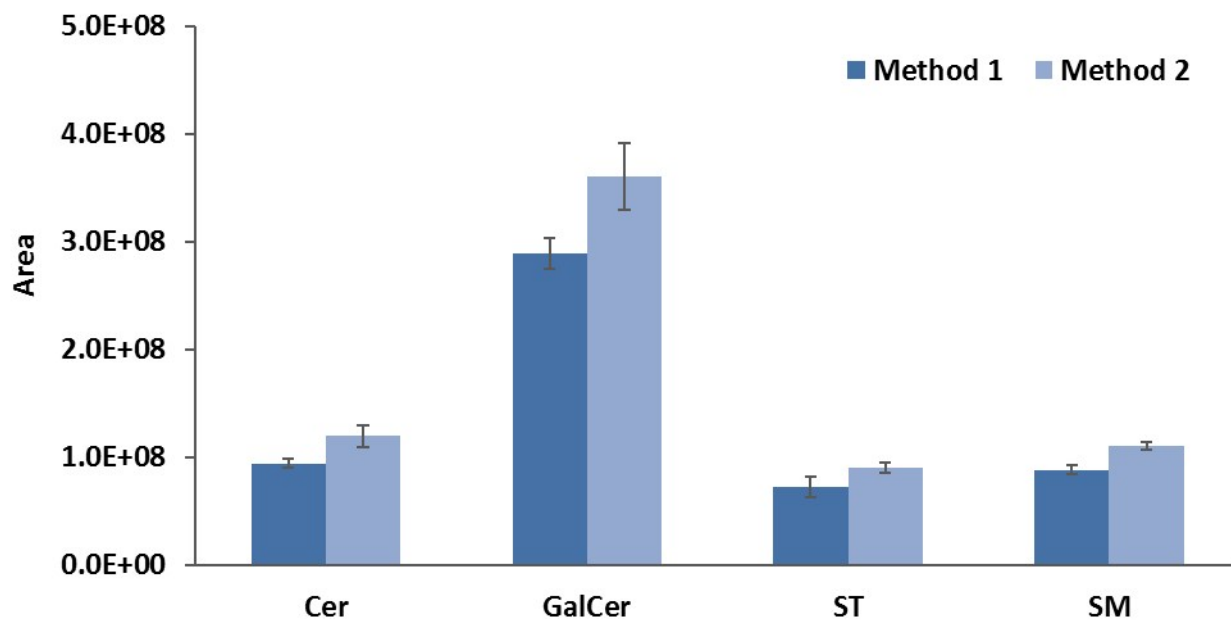

**Figure** The relative contents of sphingolipids (Cer, GalCer, ST, SM) in hippocampus extracted using the two method. Method 1: centrifugation at  $15,000 \times g$  for 30 min; Method 2: centrifugation at  $35,000 \times g$  for 30 min. The relative contents of four sphingolipid classes were represented by peak area detected in mass spectrometry as means  $\pm$  SD from three

hippocampus tissues of normal mice.
