# Supplementary material for: Effects of dietary glucocerebrosides from sea cucumber on the brain sphingolipid profiles of mouse models of Alzheimer's disease
Source: Royal Society of Chemistry journal article supplement (doi:10.1039/c6fo01659f), 2017-01-01
Supplement: c6fo01659f2.pdf [file c6fo01659f2.pdf]

## Supplementary Tables

**Supplementary Table S1** Growth parameters of C57BL/6J mice fed experimental diets

|                          | Normal       | Control      | SCG treated  |
|--------------------------|--------------|--------------|--------------|
| Food intake (g per d)    | 2.84 ± 0.24  | 2.97 ± 0.18  | 2.92 ± 0.19  |
| Initial body weight (g)  | 28.36 ± 0.45 | 27.87 ± 0.39 | 27.96 ± 0.25 |
| Eventual body weight (g) | 32.91 ± 0.73 | 33.87 ± 0.66 | 32.47 ± 0.52 |

Note: Results are expressed as means ± SEM; n = 6 mice per group.

**Supplementary Table S2** Standard curve, intra- and inter-day RE and RSD, recovery of sphingolipid standards

| Sphingolipid        | Linear equation  | R     | precision, accuracy |                    |        |         |                    |        |         | Recovery (%) |
|---------------------|------------------|-------|---------------------|--------------------|--------|---------|--------------------|--------|---------|--------------|
|                     |                  |       | (nmol/mL)           | Intra-day          |        |         | Inter-day          |        |         |              |
|                     |                  |       |                     | means±SD (nmol/mL) | RE (%) | RSD (%) | means±SD (nmol/mL) | RE (%) | RSD (%) |              |
| Cer(d18:1-C18:0)    | y=0.0054x+0.0625 | 0.998 | 0.4                 | 0.41±0.05          | 4.3    | 4.8     | 0.42±0.10          | 3.2    | 4.3     | 94.6         |
|                     |                  |       | 1.6                 | 1.66±0.14          | 6.2    | 5.9     | 1.63±0.24          | 4.5    | 6.5     | 95.3         |
| GalCer(d18:1-C24:1) | y=0.0042x-0.0908 | 0.997 | 4                   | 3.94 ± 0.34        | 7.9    | 6.3     | 3.92 ± 0.15        | 2.9    | 3.9     | 98.9         |
|                     |                  |       | 16                  | 16.74 ± 2.02       | 7.8    | 4.7     | 15.81 ± 2.01       | 6.4    | 5.2     | 97.8         |
| ST(d18:1-C24:1)     | y=0.4178x+0.0164 | 0.999 | 2                   | 2.13 ± 0.04        | 3.7    | 4.5     | 2.12 ± 0.97        | 5.6    | 3.7     | 91.1         |
|                     |                  |       | 8                   | 8.23 ± 0.15        | 5.7    | 6.3     | 8.29 ± 1.43        | 3.0    | 5.3     | 89.9         |
| SM(d18:1-C16:0)     | y=0.0518x+0.0037 | 0.998 | 4                   | 3.96 ± 0.36        | 4.7    | 7.6     | 4.12 ± 0.34        | 7.8    | 4.2     | 95.1         |
|                     |                  |       | 16                  | 15.94 ± 0.38       | 5.3    | 5.9     | 16.94 ± 0.26       | 6.2    | 3.5     | 95.4         |

**Supplementary Table S3.** Identification of Cer, ST and GalCer species in normal mice brain by RPLC-MS/MS

| Molecular species   | Precursor ion<br>( <i>m/z</i> ) | RT<br>(min) | Molecular species      | Precursor ion<br>( <i>m/z</i> ) | RT<br>(min) |
|---------------------|---------------------------------|-------------|------------------------|---------------------------------|-------------|
| Cer(d18:1-C16:0)+H  | 538.5                           | 9.19        | GalCer(d18:1-C16:0)+H  | 700.6                           | 7.60        |
| Cer(d18:1-C18:0h)+H | 582.5                           | 9.59        | GalCer(d18:1-C18:1h)+H | 742.6                           | 7.34        |
| Cer(d18:1-C18:1)+H  | 564.5                           | 9.60        | GalCer(d18:1-C18:1)+H  | 726.6                           | 8.44        |
| Cer(d18:1-C17:0)+H  | 552.6                           | 11.54       | GalCer(d18:1-C18:0h)+H | 744.6                           | 10.32       |
| Cer(d18:1-C18:0)+H  | 566.5                           | 14.45       | GalCer(d18:1-C18:0)+H  | 728.6                           | 11.67       |
| Cer(d18:1-C20:1)+H  | 592.6                           | 15.13       | GalCer(d18:1-C20:1h)+H | 770.7                           | 11.18       |
| Cer(d18:1-C20:0)+H  | 594.6                           | 22.99       | GalCer(d18:1-C20:1)+H  | 754.7                           | 12.51       |
| Cer(d18:1-C22:1)+H  | 620.6                           | 23.85       | GalCer(d18:1-C20:0h)+H | 772.7                           | 16.16       |
| Cer(d18:1-C23:1)+H  | 634.6                           | 29.78       | GalCer(d18:1-C22:1h)+H | 798.8                           | 17.13       |
| Cer(d18:1-C24:1h)+H | 664.6                           | 32.06       | GalCer(d18:1-C20:0)+H  | 756.7                           | 18.32       |
| Cer(d18:1-C22:0)+H  | 622.6                           | 37.27       | GalCer(d18:1-C22:1)+H  | 782.7                           | 19.48       |
| Cer(d18:1-C24:0h)+H | 666.6                           | 37.91       | GalCer(d18:1-C23:1h)+H | 812.8                           | 21.87       |
| Cer(d18:1-C24:1)+H  | 648.6                           | 39.33       | GalCer(d18:1-C23:1)+H  | 796.7                           | 24.32       |
| Cer(d18:1-C23:0)+H  | 636.6                           | 47.44       | GalCer(d18:1-C22:0h)+H | 800.8                           | 25.55       |
| Cer(d18:1-C24:0)+H  | 650.6                           | 58.36       | GalCer(d18:1-C24:1h)+H | 826.8                           | 26.80       |
| ST(d18:1-C16:0)-H   | 778.2                           | 2.37        | GalCer(d18:1-C22:0)+H  | 784.7                           | 29.28       |
| ST(d18:1-C18:0h)-H  | 822.6                           | 2.85        | GalCer(d18:1-C24:1)+H  | 810.8                           | 30.65       |
| ST(d18:1-C18:0)-H   | 806.6                           | 3.17        | GalCer(d18:1-C23:0h)+H | 814.8                           | 32.46       |
| ST(d18:1-C20:0h)-H  | 850.6                           | 3.98        | GalCer(d18:1-C25:1h)+H | 840.8                           | 33.85       |
| ST(d18:1-C20:0)-H   | 834.6                           | 4.58        | GalCer(d18:1-C23:0)+H  | 798.8                           | 37.14       |
| ST(d18:1-C22:0h)-H  | 878.7                           | 5.76        | GalCer(d18:1-C25:1)+H  | 824.8                           | 38.81       |
| ST(d18:1-C24:1h)-H  | 904.8                           | 5.95        | GalCer(d18:1-C24:0h)+H | 828.8                           | 41.27       |
| ST(d18:1-C22:0)-H   | 862.6                           | 6.29        | GalCer(d18:1-C26:1h)+H | 854.8                           | 42.38       |
| ST(d18:1-C24:1)-H   | 888.8                           | 6.42        | GalCer(d18:1-C24:0)+H  | 812.8                           | 47.28       |
| ST(d18:1-C24:0h)-H  | 906.8                           | 8.47        | GalCer(d18:1-C26:1)+H  | 838.8                           | 49.30       |
| ST(d18:1-C26:1h)-H  | 932.6                           | 8.99        | GalCer(d18:1-C25:0h)+H | 842.8                           | 52.58       |
| ST(d18:1-C24:0)-H   | 890.8                           | 9.32        | GalCer(d18:1-C25:0)+H  | 826.8                           | 59.03       |
| ST(d18:1-C26:1)-H   | 916.8                           | 9.796       | GalCer(d18:1-C26:0)+H  | 840.8                           | 73.26       |
| ST(d18:1-C26:0h)-H  | 934.8                           | 13.05       | GalCer(d18:1-C26:0h)+H | 856.8                           | 67.37       |
| ST(d18:1-C26:0)-H   | 918.6                           | 13.11       |                        |                                 |             |

**Supplementary Table S4** Standard curve, LOD, LOQ, intra- and inter-day RE and RSD, recovery of GluCer(d18:1-C12:0) and GalCer(d18:1-C12:0)

| Sphingolipid            | Linear equation | <i>R</i> | LOD<br>(S/N = 3)<br>(pmol/mL) | LOQ<br>(S/N = 10)<br>(pmol/mL) | Precision, accuracy |                       |           |            |                       |           | Recovery<br>(%) |            |
|-------------------------|-----------------|----------|-------------------------------|--------------------------------|---------------------|-----------------------|-----------|------------|-----------------------|-----------|-----------------|------------|
|                         |                 |          |                               |                                | (pmol/mL)           | Intra-day             |           |            | Inter-day             |           |                 |            |
|                         |                 |          |                               |                                |                     | means±SD<br>(pmol/mL) | RE<br>(%) | RSD<br>(%) | means±SD<br>(pmol/mL) | RE<br>(%) |                 | RSD<br>(%) |
| GluCer<br>(d18:1-C12:0) | y=7.875x-1.0908 | 0.999    | 10                            | 20                             | 40                  | 41.2±3.2              | 4.4       | 4.4        | 39.4±2.1              | 3.2       | 4.3             | 83.2       |
|                         |                 |          |                               |                                | 160                 | 162.3±5.8             | 6.0       | 6.9        | 163.1±7.4             | 4.5       | 6.5             | 82.9       |
| GalCer<br>(d18:1-C12:0) | y=4.328x-0.5349 | 0.999    | 10                            | 20                             | 40                  | 39.7±2.3              | 3.0       | 4.7        | 39.1±3.9              | 4.7       | 5.5             | 85.0       |
|                         |                 |          |                               |                                | 160                 | 155.1±4.2             | 2.5       | 3.3        | 158.6±6.4             | 6.8       | 7.7             | 87.5       |

## Supplementary Figures

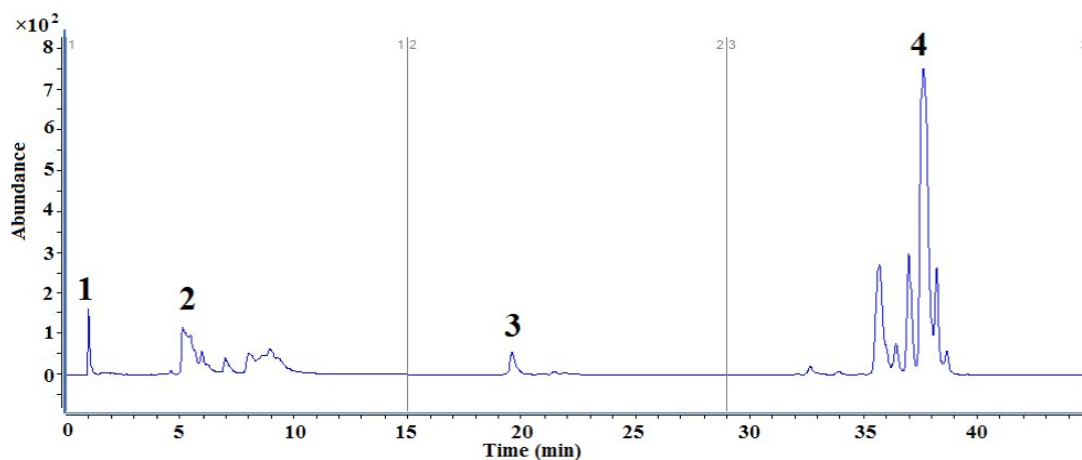

**Supplementary Fig. S1** LC ESI-MS/MS elution profiles for the sphingolipids in mice brains of normal group on normal phase liquid chromatography. Elution of complex sphingolipids in the extract of normal mice brain in positive ion mode for Cer, GalCer and SM then negative ion mode for ST. Peak 1: Cer; Peak 2: GalCer; Peak 3: ST; Peak 4: SM

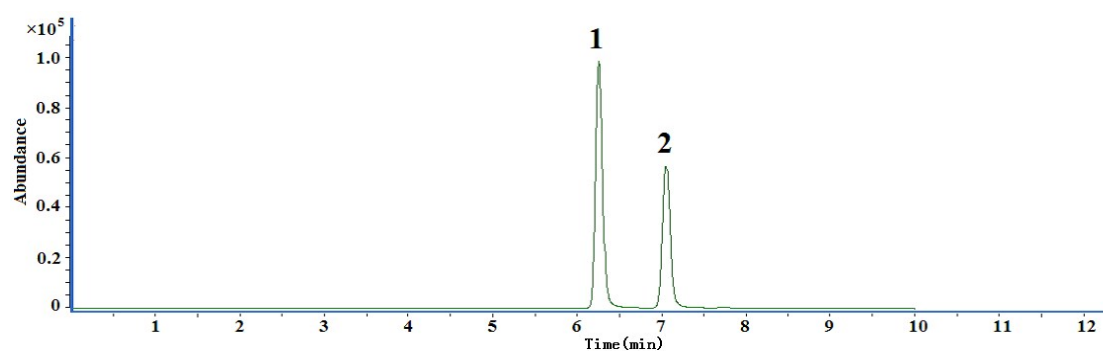

**Supplementary Fig. S2** Separation of GluCer(d18:1-12:0) and GalCer(d18:1-12:0) standards by HILIC. Separation of GluCer(d18:1-12:0) and GalCer(d18:1-12:0) standards using a Waters Atlantis HILIC Silica (4.6 mm  $\times$  150 mm, 5  $\mu$ m) column with the elution system acetonitrile-methanol- $H_2O$  (95/2.5/2.5, v/v) including 2% formic acid and 2 mM ammonium formate. 1: GluCer(d18:1-C12:0) 6.26 min; 2: GalCer(d18:1-C12:0) 7.13 min

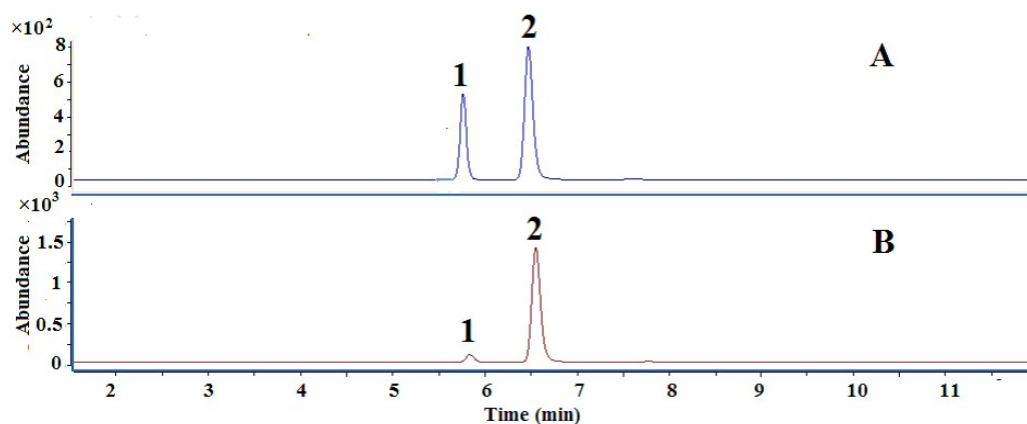

**Supplementary Figure S3** Extracted ion chromatograms of GluCer(d18:1-C18:0) and GalCer(d18:1-C18:0) in standard mixtures and mice brain. GluCer and GalCer with the same mass ( $m/z$  728.6) in cerebroside standard mixtures (A) and mice brain (B) were eluted at 5.83 and 6.56 min using MRM mode. 1: GluCer(d18:1-C18:0); 2: GalCer(d18:1-C18:0) ( $m/z$  728.6)

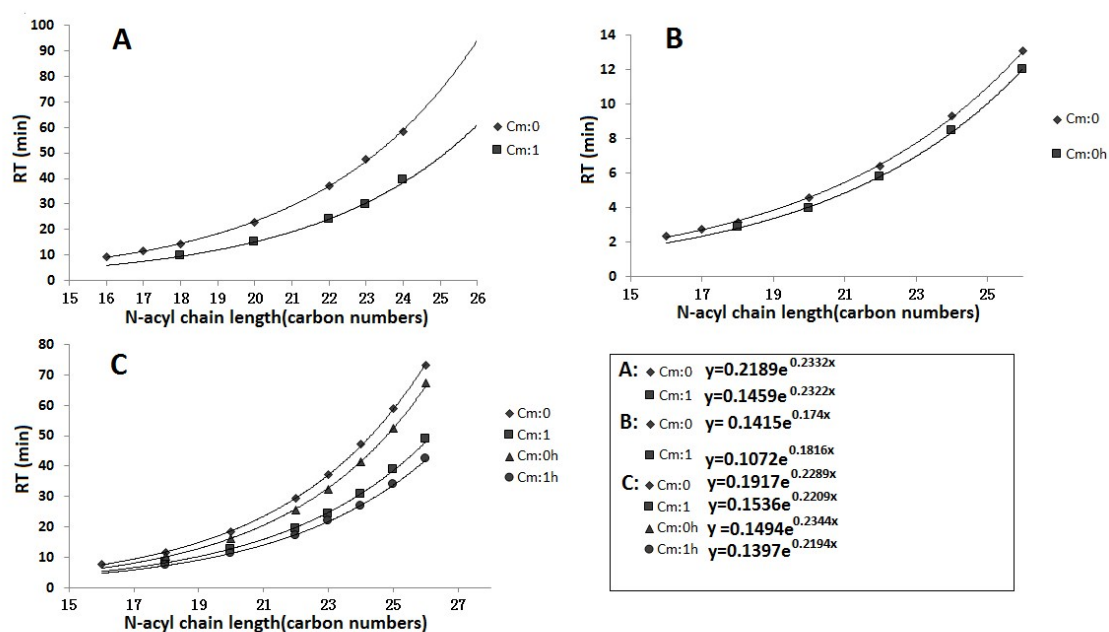

**Supplementary Figure S4** Linear relation between N-acyl chain length (carbon numbers) of Cer (A), ST (B) and CBS (C) molecular species and retention time. Cm:0 means sphingolipid with a sphingosine backbone with no double bond, and Cm:1 means a m-carbon N-acyl chain with one double bond; Cm:0h and Cm:1h mean HFA-GalCer.
